# Supplementary material
Source: MDPI journal article supplement (https://www.mdpi.com/2077-0472/13/8/1563)
Supplement: s1 [file s1]

**Supplementary Table S1.** Selected seventeen crop species (with plant families) in the study.

| <b>Plant family</b> | <b>Crop species</b>                              |
|---------------------|--------------------------------------------------|
| Apiaceae            | <i>Foeniculum vulgare</i> Mill.                  |
| Brassicaceae        | <i>Brassica juncea</i> (L.) Czern.               |
|                     | <i>Raphanus sativus</i> (L.) Domin               |
| Cucurbitaceae       | <i>Cucumis sativus</i> L.                        |
|                     | <i>Cucurbita maxima</i> Duchesne                 |
|                     | <i>Luffa aegyptiaca</i> Mill.                    |
|                     | <i>Momordica charantia</i> L.                    |
| Fabaceae            | <i>Cajanus cajan</i> L. Millsp.                  |
|                     | <i>Cicer arietinum</i> L.                        |
|                     | <i>Lablab purpureus</i> (L.) Sweet               |
|                     | <i>Pisum sativum</i> L.                          |
| Ranunculaceae       | <i>Nigella sativa</i> L.                         |
| Rutaceae            | <i>Citrus × aurantiifolia</i> (Christm.) Swingle |
|                     | <i>Citrus × limon</i> L. Osbeck                  |
|                     | <i>Citrus maxima</i> (Burm.) Merr.               |
| Solanaceae          | <i>Solanum lycopersicum</i> L.                   |
|                     | <i>Solanum melongena</i> L.                      |
