# Supplementary material
Source: MDPI journal article supplement (https://www.mdpi.com/2077-0472/13/8/1563)
Supplement: s1 [file s1]

**Supplementary Table S2.** Percentages of fruit set obtained for various crops in three pollination treatments.

| Crops                         | Fruit set (%)    |                      |                           | Kruskal-Wallis test |         |         |
|-------------------------------|------------------|----------------------|---------------------------|---------------------|---------|---------|
|                               | Open-pollination | Pollinator-exclusion | Supplementary pollination | df                  | H value | p value |
| <i>Foeniculum vulgare</i>     | 72 ± 16.87       | 47 ± 9.49            | 89 ± 11.01                | 2                   | 19.422  | ***     |
| <i>Brassica juncea</i>        | 85 ± 10.80       | 31 ± 7.38            | 93 ± 8.23                 | 2                   | 21.194  | ***     |
| <i>Raphanus sativus</i>       | 78 ± 10.33       | 26 ± 8.43            | 88 ± 10.33                | 2                   | 21.418  | ***     |
| <i>Cucumis sativus</i>        | 71 ± 11.97       | 0                    | 86 ± 9.66                 | 2                   | 23.432  | ***     |
| <i>Cucurbita maxima</i>       | 85 ± 10.80       | 0                    | 95 ± 7.07                 | 2                   | 22.728  | ***     |
| <i>Luffa aegyptiaca</i>       | 83 ± 9.49        | 0                    | 93 ± 8.23                 | 2                   | 22.750  | ***     |
| <i>Momordica charantia</i>    | 81 ± 12.87       | 0                    | 92 ± 10.33                | 2                   | 22.161  | ***     |
| <i>Cajanus cajan</i>          | 52 ± 15.49       | 30 ± 8.16            | 66 ± 10.75                | 2                   | 18.886  | ***     |
| <i>Cicer arietinum</i>        | 74 ± 13.50       | 46 ± 9.66            | 84 ± 11.74                | 2                   | 20.051  | ***     |
| <i>Lablab purpureus</i>       | 87 ± 9.49        | 83 ± 9.49            | 93 ± 8.23                 | 2                   | 5.279   | 0.071   |
| <i>Pisum sativum</i>          | 83 ± 11.60       | 41 ± 9.94            | 88 ± 10.33                | 2                   | 20.241  | ***     |
| <i>Nigella sativa</i>         | 88 ± 10.33       | 76 ± 13.50           | 93 ± 8.23                 | 2                   | 8.906   | *       |
| <i>Citrus × aurantiifolia</i> | 63 ± 11.60       | 19 ± 9.94            | 74 ± 12.65                | 2                   | 21.346  | ***     |
| <i>Citrus × limon</i>         | 29 ± 7.38        | 13 ± 6.75            | 70 ± 11.55                | 2                   | 24.956  | ***     |
| <i>Citrus maxima</i>          | 54 ± 15.06       | 32 ± 13.98           | 75 ± 12.69                | 2                   | 18.760  | ***     |
| <i>Solanum lycopersicum</i>   | 67 ± 13.37       | 41 ± 11.97           | 77 ± 9.49                 | 2                   | 18.854  | ***     |
| <i>Solanum melongena</i>      | 70 ± 14.91       | 42 ± 12.29           | 81 ± 12.87                | 2                   | 18.352  | ***     |

Significance level of *p* value: \* indicate  $p \leq 0.05$ , \*\* indicate  $p \leq 0.01$ , \*\*\* indicate  $p \leq 0.001$
